# Supplementary material for: Proteomic Changes Associated With Sperm Fertilizing Ability in Meat-Type Roosters
Source: Front Cell Dev Biol. 2021 Apr 9;9:655866. doi: 10.3389/fcell.2021.655866 (PMC8063615; doi:10.3389/fcell.2021.655866)
Supplement: Supplementary Data 3 — PCA analysis of GeLC-MS/MS. PCA analysis was conducted based on all the list of 84 DAP revealed by GeLC-MS/MS, with a preferential selection of SC differential. [file Table_3.XLSX]

## Sheet: Table 2
	Fold-change (F/SF)
Protein name	ICM-MS	GeLC-MS/MS (Spectral counting)	Immunoblotting
ovotransferrin	/	1.4	1.45
lysozyme	0.5	0.3	0.28
